# Supplementary material for: Maternal immune activation induces autism-like changes in behavior, neuroinflammatory profile and gut microbiota in mouse offspring of both sexes
Source: PubMed Central journal article supplement (PMC9474453; doi:10.1038/s41398-022-02149-9), 2022-09-14

a.

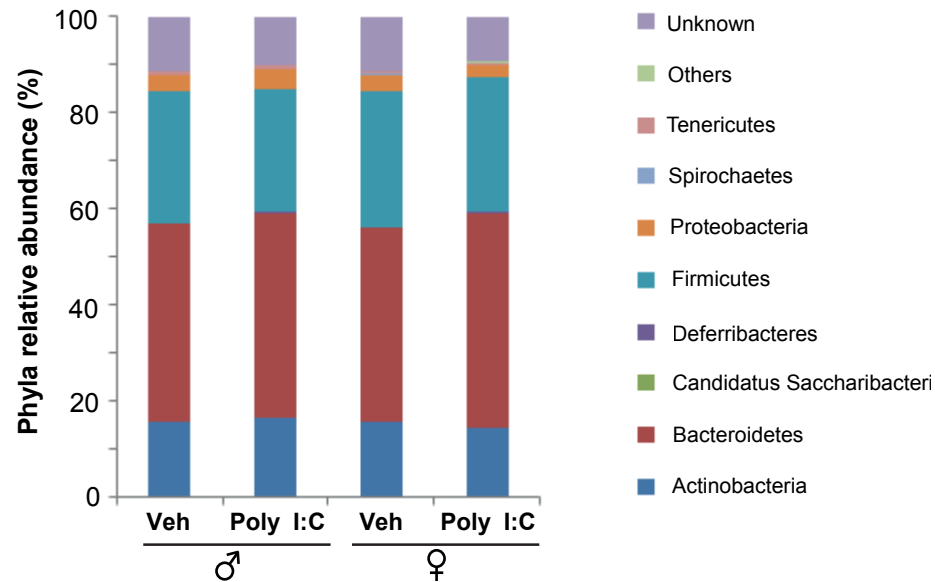

b.

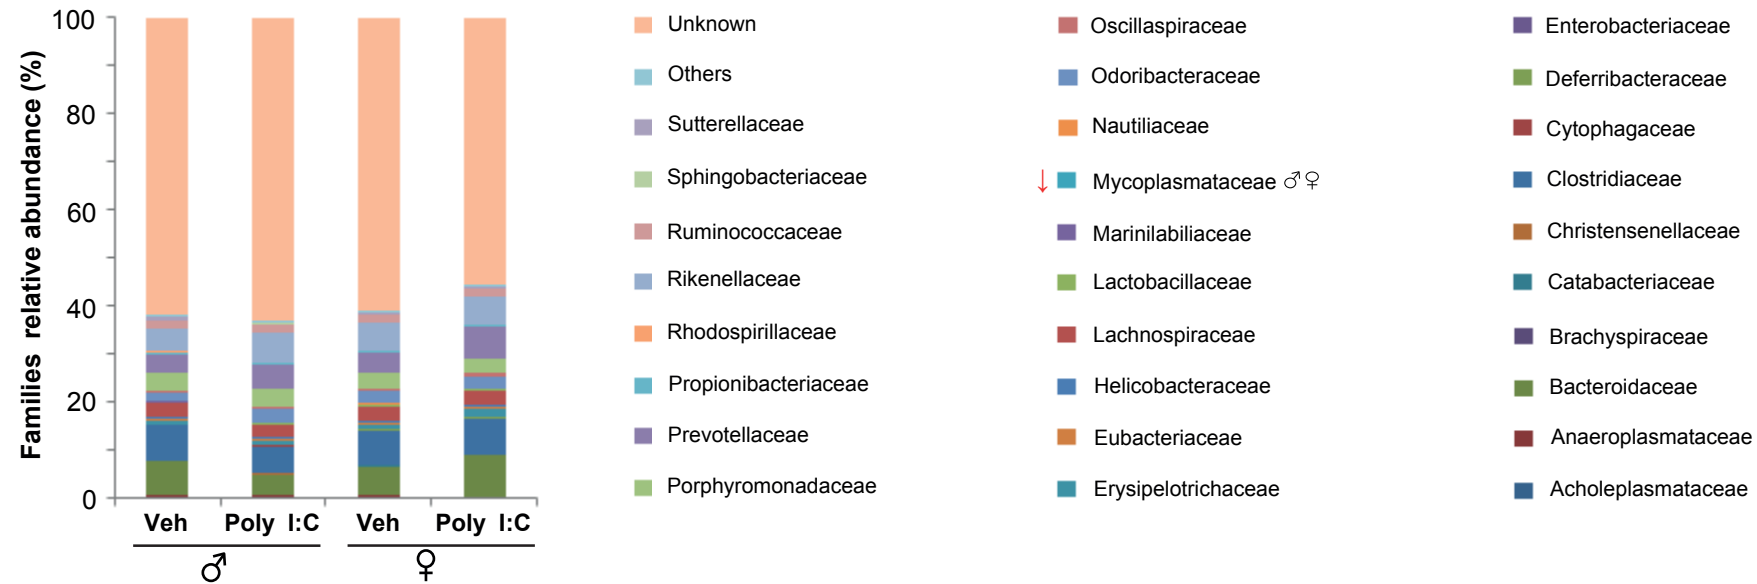

Supplement: 41398_2022_2149_MOESM2_ESM.pdf [file 41398_2022_2149_MOESM2_ESM.pdf]
