# Supplementary material for: Maternal immune activation induces autism-like changes in behavior, neuroinflammatory profile and gut microbiota in mouse offspring of both sexes
Source: PubMed Central journal article supplement (PMC9474453; doi:10.1038/s41398-022-02149-9), 2022-09-14
Supplement: 41398_2022_2149_MOESM4_ESM.pdf [file 41398_2022_2149_MOESM4_ESM.pdf]

**Supplementary Table 1. Correlation matrix of neuroinflammatory markers (pnd 28) with bacterial taxa (pnd 28) and behaviors**

|        |                         | pnd 28        |              |              |              |         |         |                  |                 |                         |                     |
|--------|-------------------------|---------------|--------------|--------------|--------------|---------|---------|------------------|-----------------|-------------------------|---------------------|
|        |                         | Bacteroidetes | Firmicutes   | Tyzzarella   | Turicibacter | BDNF HP | ARG1 HP | TNF- $\alpha$ CB | Social behavior | Spontaneous alternation | Prepulse inhibition |
| pnd 28 | Bacteroidetes           |               | <b>-.526</b> | -.183        | .075         | -.339   | -.070   | <b>.584</b>      | -.083           | -.065                   | <b>-.605</b>        |
|        | Firmicutes              | <b>-.526</b>  |              | -.081        | .238         | -.343   | .063    | -.616            | .176            | -1.732E-5               | .297                |
|        | Tyzzarella              | -.183         | -.081        |              | <b>-.692</b> | .625    | -.028   | -.032            | .067            | .200                    | -.255               |
|        | Turicibacter            | .075          | .238         | <b>-.692</b> |              | -.514   | .427    | .080             | -.379           | -.402                   | .050                |
|        | BDNF HP                 | -.339         | -.343        | <b>.625</b>  | <b>-.514</b> |         | -.113   | -.129            | .023            | .046                    | -.027               |
|        | ARG1 HP                 | -.070         | .063         | -.028        | .427         | -.113   |         | .253             | -.428           | -.298                   | -.382               |
|        | TNF- $\alpha$ CB        | <b>.584</b>   | <b>-.616</b> | -.032        | .080         | -.129   | .253    |                  | -.535           | -.301                   | <b>-.621</b>        |
|        | Social behavior         | -.083         | .176         | .067         | -.379        | .023    | -.428   | <b>-.535</b>     |                 | <b>.796</b>             | .161                |
|        | Spontaneous alternation | -.065         | -1.732E-5    | .200         | -.402        | .046    | -.298   | -.301            | <b>.796</b>     |                         | .171                |
|        | Prepulse inhibition     | <b>-.605</b>  | .297         | -.255        | .050         | -.027   | -.382   | <b>-.621</b>     | .161            | .171                    |                     |

16 observations were used in this computation; pnd = post-natal day; HP = hippocampus; CB = cerebellum.

Values in bold are a significance level  $\alpha < 0.05$ .
