# Supplementary material for: Maternal immune activation induces autism-like changes in behavior, neuroinflammatory profile and gut microbiota in mouse offspring of both sexes
Source: PubMed Central journal article supplement (PMC9474453; doi:10.1038/s41398-022-02149-9), 2022-09-14
Supplement: 41398_2022_2149_MOESM5_ESM.pdf [file 41398_2022_2149_MOESM5_ESM.pdf]

**Supplementary Table 2. Correlation matrix of neuroinflammatory markers (pnd 120) with behaviors**

|         |                         | pnd 28      |                  |         |                 |                         |                     |
|---------|-------------------------|-------------|------------------|---------|-----------------|-------------------------|---------------------|
|         |                         | ARG1 HP     | TNF- $\alpha$ CB | IL-6 CB | Social behavior | Spontaneous alternation | Prepulse inhibition |
| pnd 120 | ARG1 HP                 |             | -.826            | -.517   | <b>.578</b>     | .472                    | .283                |
|         | TNF- $\alpha$ CB        | -.826       |                  | .582    | -.641           | -.493                   | <b>-.514</b>        |
|         | IL-6 CB                 | -.517       | .582             |         | -.484           | -.316                   | -.439               |
|         | Social behavior         | <b>.578</b> | -.641            | -.484   |                 | .796                    | .161                |
|         | Spontaneous alternation | .472        | -.493            | -.316   | .796            |                         | .171                |
|         | Prepulse inhibition     | .283        | <b>-.514</b>     | -.439   | .161            | .171                    |                     |

16 observations were used in this computation; pnd = post-natal day; HP = hippocampus; CB = cerebellum.

Values in bold are a significance level  $\alpha < 0.05$ .
